# Supplementary material for: Untargeted and Targeted Metabolomics and Tryptophan Decarboxylase In Vivo Characterization Provide Novel Insight on the Development of Kiwifruits (Actinidia deliciosa)
Source: MDPI journal article supplement (doi:10.3390/ijms20040897), 2019-02-19
Supplement: s1 [file s1]

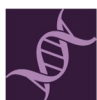

# Untargeted and targeted metabolomics and Tryptophan Decarboxylase *in vivo* characterization provide novel insight on the development of kiwifruits (*Actinidia deliciosa*)

## Supplementary File 2

Table 1. Primer list.

| Gene description                   | Primer direction | Primer length (bp) | T <sub>m</sub> (°C) | Amplicon length (bp) | Primer Sequence                      |
|------------------------------------|------------------|--------------------|---------------------|----------------------|--------------------------------------|
| AdTDC                              | FOR              | 22                 | 61*                 | 1510                 | <u><b>CACCATGGGCAGCCTCGACTCC</b></u> |
|                                    | REV              | 25                 | 61*                 |                      | CTATGTAGCATCCTTTGACCTGAGC            |
| AdTDC<br>(q-RT-PCR)                | FOR              | 20                 | 65                  | 98                   | TGGCAAGTGGGTACGGGTCTG                |
|                                    | REV              | 20                 | 65                  |                      | TCCGACCGGATGTGGCTCTG                 |
| Actin<br>(q-RT-PCR;<br>Achn107181) | FOR              | 20                 | 65                  | 94                   | GTCTCGACCTTGCTGGCCGT                 |
|                                    | REV              | 20                 | 65                  |                      | ATTCCCGTTCGGCCGTGGT                  |

The CACC tag for the directional cloning is underlined in bold. Asterisks indicate the T<sub>m</sub> assessed by OligoPerfect (Thermo Fisher Scientific).

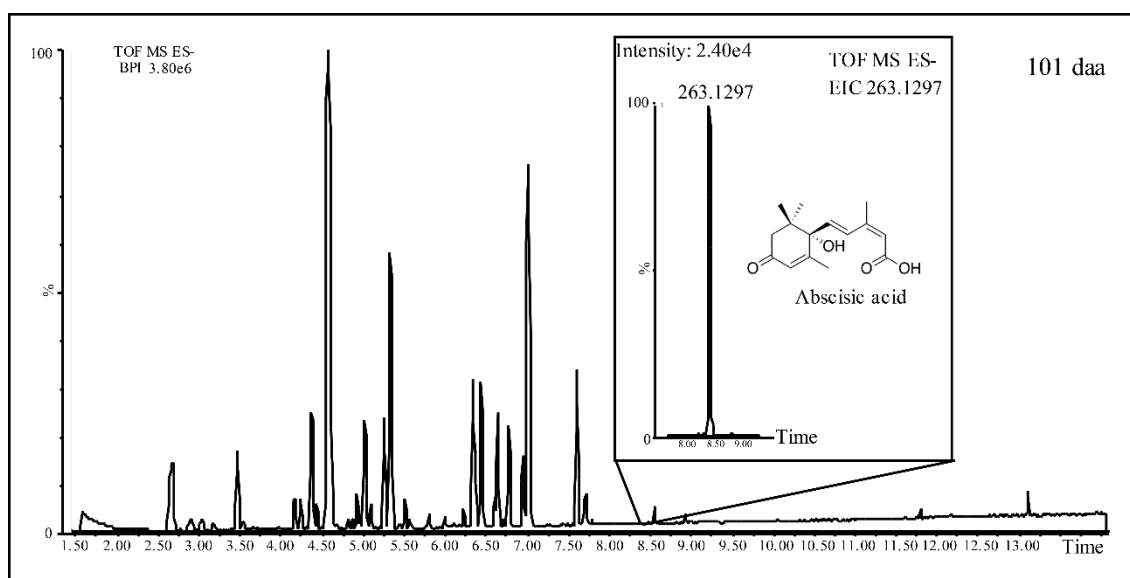

**Figure S1:** ABA peak detected by negative UPLC-MS analysis. The sample is a kiwifruit methanol extract corresponding to 101 days after anthesis (daa). The box highlights the peak corresponding to absciscic acid.

```

# Aligned_sequences: 2
# 1: Achn173261
# 2: AdTDC11
# Matrix: EBLOSUM62
# Gap_penalty: 10.0
# Extend_penalty: 0.5
#
# Length: 501
# Identity:      497/501 (99.2%)
# Similarity:    499/501 (99.6%)
# Gaps:          0/501 ( 0.0%)
# Score: 2635.0
#
#
#=====
Achn173261      1  MGSLSNFSVNSTEFKPLDPEEFRKQAHTMVDFIADYYKNIETYPVLSQA      50
AdTDC11         1  MGSLSNFSVNSTEFKPLDPEEFRKQAHTMVDFIADYYKNIETYPVLSQA      50
Achn173261     51  QPGYLRARLPETAPYRPETFETILQDVEKSIIPGITHWLSPKFFAFFPAT     100
AdTDC11        51  QPGYLRARLPETAPYRPETFETILQDVEKSIIPGITHWLSPKFFAFFPAT     100
Achn173261    101  VSTAAFLGEMLCCTCFNSVGFNWLASPAATELEMVMDWLAHMLKLPKSF      150
AdTDC11       101  VSTAAFLGEMLCCTCFNSVGFNWLASPAATELEMVMDWLAHMLKLPKSF      150
Achn173261    151  FQGTGGGVIQGTTSDSILCTLVAARNRALENVGVNDIGKLVVYGSQDQTHS    200
AdTDC11       151  FQGTGGGVIQGTTSDSILCTLVAARNRTLENVGVNDIGKLVVYGSQDQTHS    200
Achn173261    201  TYTKACKLAGIYPRNIRSVAGSDTCFAMSPVALRKVIDADLAAGMVPLY      250
AdTDC11       201  TYTKACKLAGIYPRNIRSVAGSDTCFAMSPVALRKVIDADLAAGLVPLY      250
Achn173261    251  LCVTVGTTSTTAVDPLEDLADVANDYGVVHVDAAYGGSACICPEFRHYL      300
AdTDC11       251  LCVTVGTTSTTAVDPLEDLADVANDYGVVHVDAAYGGSACICPEFRHYL      300
Achn173261    301  DGIELVDSLSPHKWLLSYLDCCCLWVKQPGLLVKALSTNPEYLRNKPR      350
AdTDC11       301  DGIELVDSLSPHKWLLSYLDCCCLWVKQPGLLVKALSTNPEYLRNKPS      350
Achn173261    351  ESDSVVDYKDWQVGTGRRFKALRLWLVLRSYGIANLQSHIRSDVRMAKMF    400
AdTDC11       351  ESDSVVDYKDWQVGTGRRFKALRLWLVLRSYGIANLQSHIRSDVRMAKMF    400
Achn173261    401  EGFVKSDPRFELVVPRIFFSLVCFRLNPHPGSYPGYLELLNKKLLEWVNST    450
AdTDC11       401  EGFVKSDPRFELVVPRIFFSLVCFRLNPHPGSYPGYLELLNKKLLEWVNST    450
Achn173261    451  GGLYMTHTVAGGLYMLRFVAGATLTEECHVVAAWKIIKEGADVLLRSKDA     500
AdTDC11       451  GGLYMTHTVAGGLYMLRFVAGATLTEECHVVAAWKIIKEGADVLLRSKDA     500
Achn173261    501  T      501
AdTDC11       501  T      501

```

**Figure S2:** ClustalW alignment of the amino acid sequences of AdTDC11 and Achn173261.

[illegible]



|            |                                                             |     |
|------------|-------------------------------------------------------------|-----|
| AdTDC19    | GAAACTGCCCCGTACCGCCCTGAAACGTTGAAACCATACTACAAGACGTGGAGAAGAGC | 240 |
| AdTDC20    | GAAACTGCCCCGTACCGCCCTGAAACGTTGAAACCATACTACAAGACGTGGAGAAGAGC | 240 |
|            | *****                                                       |     |
| Achn173261 | ATAATACCGGAATCACCCATTGGCTGAGCCCTAAGTTTTTGGCTTTTTTCCGGCTACC  | 300 |
| AdTDC1     | ATAATACCGGAATCACCCATTGGCTGAGCCCTAAGTTTTTGGCTTTTTTCCGGCCACC  | 300 |
| AdTDC2     | ATAATACCGGAATCACCCATTGGCTGAGCCCTAAGTTTTTGGCTTTTTTCCGGCCACC  | 300 |
| AdTDC3     | ATAATACCGGAATCACCCATTGGCTGAGCCCTAAGTTTTTGGCTTTTTTCCGGCCACC  | 300 |
| AdTDC4     | ATAATACCGGAATCACCCATTGGCTGAGCCCTAAGTTTTTGGCTTTTTTCCGGCCACC  | 300 |
| AdTDC5     | ATAATACCGGAATCACCCATTGGCTGAGCCCTAAGTTTTTGGCTTTTTTCCGGCCACC  | 300 |
| AdTDC6     | ATAATACCGGAATCACCCATTGGCTGAGCCCTAAGTTTTTGGCTTTTTTCCGGCCACC  | 300 |
| AdTDC7     | ATAATACCGGAATCACCCATTGGCTGAGCCCTAAGTTTTTGGCTTTTTTCCGGCCACC  | 300 |
| AdTDC8     | ATAATACCGGAATCACCCATTGGCTGAGCCCTAAGTTTTTGGCTTTTTTCCGGCCACC  | 300 |
| AdTDC9     | ATAATACCGGAATCACCCATTGGCTGAGCCCTAAGTTTTTGGCTTTTTTCCAGCCACC  | 300 |
| AdTDC10    | ATAATACCGGAATCACCCATTGGCTGAGCCCTAAGTTTTTGGCTTTTTTCCAGCCACC  | 300 |
| AdTDC11    | ATAATACCGGAATCACCCATTGGCTGAGCCCTAAATTTTTGGCTTTTTTCCGGCTACC  | 300 |
| AdTDC12    | ATAATACCGGAATCACCCATTGGCTGAGCCCTAAATTTTTGGCTTTTTTCCGGCTACC  | 300 |
| AdTDC13    | ATAATACCGGAATCACCCATTGGCTGAGCCCTAAATTTTTGGCTTTTTTCCGGCTACC  | 300 |
| AdTDC14    | ATAATACCGGAATCACCCATTGGCTGAGCCCTAAATTTTTGGCTTTTTTCCGGCTACC  | 300 |
| AdTDC15    | ATAATACCGGAATCACCCATTGGCTGAGCCCTAAATTTTTGGCTTTTTTCCGGCTACC  | 300 |
| AdTDC16    | ATAATACCGGAATCACCCATTGGCTGAGCCCTAAGTTTTTGGCTTTTTTCCGGCTACC  | 300 |
| AdTDC17    | ATAATACCGGAATCACCCATTGGCTGAGCCCTAAGTTTTTGGCTTTTTTCCGGCTACC  | 300 |
| AdTDC18    | ATAATACCGGAATCACCCATTGGCTGAGCCCTAAGTTTTTGGCTTTTTTCCGGCTACC  | 300 |
| AdTDC19    | ATAATACCGGAATCACCCATTGGCTGAGCCCTAAGTTTTTGGCTTTTTTCCGGCTACC  | 300 |
| AdTDC20    | ATAATACCGGAATCACCCATTGGCTGAGCCCTAAGTTTTTGGCTTTTTTCCGGCTACC  | 300 |
|            | *****                                                       |     |
| Achn173261 | GTGAGCACGGCGGCGTTTCTGGGGGAGATGCTGTGCACGTGCTTTAATCTGTGGGGTTC | 360 |
| AdTDC1     | GTGAGCACGGCGGCGTTTCTGGGGGAGATGCTGTGCACGTGCTTTAATCTGTGGGGTTC | 360 |
| AdTDC2     | GTGAGCACGGCGGCGTTTCTGGGGGAGATGCTGTGCACGTGCTTTAATCTGTGGGGTTC | 360 |
| AdTDC3     | GTGAGCACGGCGGCGTTTCTGGGGGAGATGCTGTGCACGTGCTTTAATCTGTGGGGTTC | 360 |
| AdTDC4     | GTGAGCACGGCGGCGTTTCTGGGGGAGATGCTGTGCACGTGCTTTAATCTGTGGGGTTC | 360 |
| AdTDC5     | GTGAGCACGGCGGCGTTTCTGGGGGAGATGCTGTGCACGTGCTTTAATCTGTGGGGTTC | 360 |
| AdTDC6     | GTGAGCACGGCGGCGTTTCTGGGGGAGATGCTGTGCACGTGCTTTAATCTGTGGGGTTC | 360 |
| AdTDC7     | GTGAGCACGGCGGCGTTTCTGGGGGAGATGCTGTGCACGTGCTTTAATCTGTGGGGTTC | 360 |
| AdTDC8     | GTGAGCACGGCGGCGTTTCTGGGGGAGATGCTGTGCACGTGCTTTAATCTGTGGGGTTC | 360 |
| AdTDC9     | GTGAGCACGGCGGCGTTTCTGGGGGAGATGCTGTGCACGTGCTTTAATCTGTGGGGTTC | 360 |
| AdTDC10    | GTGAGCACGGCGGCGTTTCTGGGGGAGATGCTGTGCACGTGCTTTAATCTGTGGGGTTC | 360 |
| AdTDC11    | GTGAGCACGGCGGCGTTTCTGGGGGAGATGCTGTGCACGTGCTTTAATCTGTGGGGTTC | 360 |
| AdTDC12    | GTGAGCACGGCGGCGTTTCTGGGGGAGATGCTGTGCACGTGCTTTAATCTGTGGGGTTC | 360 |
| AdTDC13    | GTGAGCACGGCGGCGTTTCTGGGGGAGATGCTGTGCACGTGCTTTAATCTGTGGGGTTC | 360 |
| AdTDC14    | GTGAGCACGGCGGCGTTTCTGGGGGAGATGCTGTGCACGTGCTTTAATCTGTGGGGTTC | 360 |
| AdTDC15    | GTGAGCACGGCGGCGTTTCTGGGGGAGATGCTGTGCACGTGCTTTAATCTGTGGGGTTC | 360 |
| AdTDC16    | GTGAGCACGGCGGCGTTTCTGGGGGAGATGCTGTGCACGTGCTTTAATCTGTGGGGTTC | 360 |

|            |                                                               |     |
|------------|---------------------------------------------------------------|-----|
| AdTDC17    | GTGAGCACGGCGGCGTTTCTGGGGGAGATGCTGTGCACGTGCTTTAATTCTGTGGGGTTC  | 360 |
| AdTDC18    | GTGAGCACGGCGGCGTTTCTGGGGGAGATGCTGTGCACGTGCTTTAATTCTGTGGGGTTC  | 360 |
| AdTDC19    | GTGAGCACGGCGGCGTTTCTGGGGGAGATGCTGTGCACGTGCTTTAATTCTGTGGGGTTC  | 360 |
| AdTDC20    | GTGAGCACGGCGGCGTTTCTGGGGGAGATGCTGTGCACGTGCTTTAATTCTGTGGGGTTC  | 360 |
|            | *****                                                         |     |
| Achn173261 | AACTGGCTGGCCTCGCCGGCGGCAACGGAGCTGGAGATGGTGGTCATGGACTGGCTGGCC  | 420 |
| AdTDC1     | AACTGGCTGGCCTCGCCGGCGGCAACGGAGCTGGAGATGGTGGTCATGGACTGGCTGGCC  | 420 |
| AdTDC2     | AACTGGCTGGCCTCGCCGGCGGCAACGGAGCTGGAGATGGTGGTCATGGACTGGCTGGCC  | 420 |
| AdTDC3     | AACTGGCTGGCCTCGCCGGCGGCAACGGAGCTGGAGATGGTGGTCATGGACTGGCTGGCC  | 420 |
| AdTDC4     | AACTGGCTGGCCTCGCCGGCGGCAACGGAGCTGGAGATGGTGGTCATGGACTGGCTGGCC  | 420 |
| AdTDC5     | AACTGGCTGGCCTCGCCGGCGGCAACGGAGCTGGAGATGGTGGTCATGGACTGGCTGGCC  | 420 |
| AdTDC6     | AACTGGCTGGCCTCGCCGGCGGCAACGGAGCTGGAGATGGTGGTCATGGACTGGCTGGCC  | 420 |
| AdTDC7     | AACTGGCTGGCCTCGCCGGCGGCAACGGAGCTGGAGATGGTGGTCATGGACTGGCTGGCC  | 420 |
| AdTDC8     | AACTGGCTGGCCTCGCCGGCGGCAACGGAGCTGGAGATGGTGGTCATGGACTGGCTGGCC  | 420 |
| AdTDC9     | AACTGGTTGGCCTCGCCGGCGGCAACGGAGCTGGAGATGGTGGTCATGGACTGGCTGGCT  | 420 |
| AdTDC10    | AACTGGTTGGCCTCGCCGGCGGCAACGGAGCTGGAGATGGTGGTCATGGACTGGCTGGCT  | 420 |
| AdTDC11    | AACTGGCTGGCCTCGCCGGCGGCAACGGAGCTGGAGATGGTGGTCATGGACTGGCTGGCC  | 420 |
| AdTDC12    | AACTGGCTGGCCTCGCCGGCGGCAACGGAGCTGGAGATGGTGGTCATGGACTGGCTGGCC  | 420 |
| AdTDC13    | AACTGGCTGGCCTCGCCGGCGGCAACGGAGCTGGAGATGGTGGTCATGGACTGGCTGGCC  | 420 |
| AdTDC14    | AACTGGCTGGCCTCGCCGGCGGCAACGGAGCTGGAGATGGTGGTCATGGACTGGCTGGCC  | 420 |
| AdTDC15    | AACTGGCTGGCCTCGCCGGCGGCAACGGAGCTGGAGATGGTGGTCATGGACTGGCTGGCC  | 420 |
| AdTDC16    | AACTGGCTGGCCTCGCCGGCGGCAACGGAGCTGGAGATGGTGGTCATGGACTGGCTGGCC  | 420 |
| AdTDC17    | AACTGGCTGGCCTCGCCGGCGGCAACGGAGCTGGAGATGGTGGTCATGGACTGGCTGGCC  | 420 |
| AdTDC18    | AACTGGCTGGCCTCGCCGGCGGCAACGGAGCTGGAGATGGTGGTCATGGACTGGCTGGCC  | 420 |
| AdTDC19    | AACTGGCTGGCCTCGCCGGCGGCAACGGAGCTGGAGATGGTGGTCATGGACTGGCTGGCC  | 420 |
| AdTDC20    | AACTGGCTGGCCTCGCCGGCGGCAACGGAGCTGGAGATGGTGGTCATGGACTGGCTGGCC  | 420 |
|            | *****                                                         |     |
| Achn173261 | CACATGTTGAAGCTTCCTAAATCTTTTCATGTTTCAAGGCACGGGTGGTGGGGTCATACAA | 480 |
| AdTDC1     | CACATGTTGAAGCTTCCTAAATCTTTTCATGTTTCAAGGCACGGGTGGTGGGGTCATACAA | 480 |
| AdTDC2     | CACATGTTGAAGCTTCCTAAATCTTTTCATGTTTCAAGGCACGGGTGGTGGGGTCATACAA | 480 |
| AdTDC3     | CACATGTTGAAGCTTCCTAAATCTTTTCATGTTTCAAGGCACGGGTGGTGGGGTCATACAA | 480 |
| AdTDC4     | CACATGTTGAAGCTTCCTAAATCTTTTCATGTTTCAAGGCACGGGTGGTGGGGTCATACAA | 480 |
| AdTDC5     | CACATGTTGAAGCTTCCTAAATCTTTTCATGTTTCAAGGCACGGGTGGTGGGGTCATACAA | 480 |
| AdTDC6     | CACATGTTGAAGCTTCCTAAATCTTTTCATGTTTCAAGGCACGGGTGGTGGGGTCATACAA | 480 |
| AdTDC7     | CACATGTTGAAGCTTCCTAAATCTTTTCATGTTTCAAGGCACGGGTGGTGGGGTCATACAA | 480 |
| AdTDC8     | CACATGTTGAAGCTTCCTAAATCTTTTCATGTTTCAAGGCACGGGTGGTGGGGTCATACAA | 480 |
| AdTDC9     | CACATGTTGAAGCTTCCTAAATCTTTTCATGTTTCAAGGCACGGGTGGTGGGGTCATACAA | 480 |
| AdTDC10    | CACATGTTGAAGCTTCCTAAATCTTTTCATGTTTCAAGGCACGGGTGGTGGGGTCATACAA | 480 |
| AdTDC11    | CACATGTTGAAGCTTCCTAAATCTTTTCATGTTTCAAGGCACGGGTGGTGGGGTCATACAA | 480 |
| AdTDC12    | CACATGTTGAAGCTTCCTAAATCTTTTCATGTTTCAAGGCACGGGTGGTGGGGTCATACAA | 480 |
| AdTDC13    | CACATGTTGAAGCTTCCTAAATCTTTTCATGTTTCAAGGCACGGGTGGTGGGGTCATACAA | 480 |
| AdTDC14    | CACATGTTGAAGCTTCCTAAATCTTTTCATGTTTCAAGGCACGGGTGGTGGGGTCATACAA | 480 |

|            |                                                                        |     |
|------------|------------------------------------------------------------------------|-----|
| AdTDC15    | CACATGTTGAAGCTTCCTAAATCTTTCATGTTTCAAGGCACGGGTGGTGGGGTCATACAA           | 480 |
| AdTDC16    | CACATGTTGAAGCTTCCTAAATCTTTCATGTTTCAAGGCACGGGTGGTGGGGTCATACAA           | 480 |
| AdTDC17    | CACATGTTGAAGCTTCCTAAATCTTTCATGTTTCAAGGCACGGGTGGTGGGGTCATACAA           | 480 |
| AdTDC18    | CACATGTTGAAGCTTCCTAAATCTTTCATGTTTCAAGGCACGGGTGGTGGGGTCATACAA           | 480 |
| AdTDC19    | CACATGTTGAAGCTTCCTAAATCTTTCATGTTTCAAGGCACGGGTGGTGGGGTCATACAA           | 480 |
| AdTDC20    | CACATGTTGAAGCTTCCTAAATCTTTCATGTTTCAAGGCACGGGTGGTGGGGTCATACAA           | 480 |
|            | *****                                                                  |     |
| Achn173261 | GGCACAAC TAGT GACT CGAT CCTCTG CACCCTCG TCGCCG CAGAGAAC CGTGCA CTGCGAG | 540 |
| AdTDC1     | GGCACAAC TAGT GACT CGAT CCTCTG CACCCTCG TTGCCG CAGAGACC GTGCACTG CAG   | 540 |
| AdTDC2     | GGCACAAC TAGT GACT CGAT CCTCTG CACCCTCG TTGCCG CAGAGACC GTGCACTG CAG   | 540 |
| AdTDC3     | GGCACAAC TAGT GACT CGAT CCTCTG CACCCTCG TTGCCG CAGAGACC GTGCACTG CAG   | 540 |
| AdTDC4     | GGCACAAC TAGT GACT CGAT CCTCTG CACCCTCG TTGCCG CAGAGACC GTGCACTG CAG   | 540 |
| AdTDC5     | GGCACAAC TAGT GACT CGAT CCTCTG CACCCTCG TTGCCG CAGAGACC GTGCACTG CAG   | 540 |
| AdTDC6     | GGCACAAC TAGT GACT CGAT CCTCTG CACCCTCG TTGCCG CAGAGACC GTGCACTG CAG   | 540 |
| AdTDC7     | GGCACAAC TAGT GACT CGAT CCTCTG CACCCTCG TTGCCG CAGAGACC GTGCACTG CAG   | 540 |
| AdTDC8     | GGCACAAC TAGT GACT CGAT CCTCTG CACCCTCG TTGCCG CAGAGACC GTGCACTG CAG   | 540 |
| AdTDC9     | GGCACAAC TAGT GACT CGAT CCTCTG CACCCTCG TTGCCG CAGAGACC GTGCACTG CAG   | 540 |
| AdTDC10    | GGCACAAC TAGT GACT CGAT CCTCTG CACCCTCG TTGCCG CAGAGACC GTGCACTG CAG   | 540 |
| AdTDC11    | GGCACAAC TAGT GACT CGAT CCTCTG CACCCTCG TCGCCG CAGAGAAC CGTACACTG CAG  | 540 |
| AdTDC12    | GGCACAAC TAGT GACT CGAT CCTCTG CACCCTCG TCGCCG CAGAGAAC CGTACACTG CAG  | 540 |
| AdTDC13    | GGCACAAC TAGT GACT CGAT CCTCTG CACCCTCG TCGCCG CAGAGAAC CGTACACTG CAG  | 540 |
| AdTDC14    | GGCACAAC TAGT GACT CGAT CCTCTG CACCCTCG TCGCCG CAGAGAAC CGTACACTG CAG  | 540 |
| AdTDC15    | GGCACAAC TAGT GACT CGAT CCTCTG CACCCTCG TCGCCG CAGAGAAC CGTACACTG CAG  | 540 |
| AdTDC16    | GGCACAAC TAGT GACT CGAT CCTCTG CACCCTCG TCGCCG CAGAGAAC CGTACACTG CAG  | 540 |
| AdTDC17    | GGCACAAC TAGT GACT CGAT CCTCTG CACCCTCG TCGCCG CAGAGAAC CGTACACTG CAG  | 540 |
| AdTDC18    | GGCACAAC TAGT GACT CGAT CCTCTG CACCCTCG TCGCCG CAGAGAAC CGTACACTG CAG  | 540 |
| AdTDC19    | GGCACAAC TAGT GACT CGAT CCTCTG CACCCTCG TCGCCG CAGAGAAC CGTACACTG CAG  | 540 |
| AdTDC20    | GGCACAAC TAGT GACT CGAT CCTCTG CACCCTCG TCGCCG CAGAGAAC CGTACACTG CAG  | 540 |
|            | *****                                                                  |     |
| Achn173261 | AACGTGGGTGTTGATAATATCGGTAAGCTCGTCGTGTACGGCTCTGATCAGACTCATTCT           | 600 |
| AdTDC1     | AACGTGGGCGTTGATAATATCGGTAAGCTCGTCGTGTATGGCTCTGATCAGACTCATTCT           | 600 |
| AdTDC2     | AACGTGGGCGTTGATAATATCGGTAAGCTCGTCGTGTATGGCTCTGATCAGACTCATTCT           | 600 |
| AdTDC3     | AACGTGGGCGTTGATAATATCGGTAAGCTCGTCGTGTATGGCTCTGATCAGACTCATTCT           | 600 |
| AdTDC4     | AACGTGGGCGTTGATAATATCGGTAAGCTCGTCGTGTATGGCTCTGATCAGACTCATTCT           | 600 |
| AdTDC5     | AACGTGGGCGTTGATAATATCGGTAAGCTCGTCGTGTATGGCTCTGATCAGACTCATTCT           | 600 |
| AdTDC6     | AACGTGGGCGTTGATAATATCGGTAAGCTCGTCGTGTATGGCTCTGATCAGACTCATTCT           | 600 |
| AdTDC7     | AACGTGGGCGTTGATAATATCGGTAAGCTCGTCGTGTATGGCTCTGATCAGACTCATTCT           | 600 |
| AdTDC8     | AACGTGGGCGTTGATAATATCGGTAAGCTCGTCGTGTATGGCTCTGATCAGACTCATTCT           | 600 |
| AdTDC9     | AACGTGGGCGTTGATAATATCGGTAAGCTCGTCGTGTATGGCTCTGATCAGACTCATTCT           | 600 |
| AdTDC10    | AACGTGGGCGTTGATAATATCGGTAAGCTCGTCGTGTATGGCTCTGATCAGACTCATTCT           | 600 |
| AdTDC11    | AACGTGGGCGTTGATAATATCGGTAAGCTCGTCGTGTACGGCTCTGATCAGACTCATTCT           | 600 |
| AdTDC12    | AACGTGGGCGTTGATAATATCGGTAAGCTCGTCGTGTACGGCTCTGATCAGACTCATTCT           | 600 |

|         |                                                              |     |
|---------|--------------------------------------------------------------|-----|
| AdTDC13 | AACGTGGGCGTTGATAATATCGGTAAGCTCGTCGTGTACGGCTCTGATCAGACTCATTCT | 600 |
| AdTDC14 | AACGTGGGCGTTGATAATATCGGTAAGCTCGTCGTGTACGGCTCTGATCAGACTCATTCT | 600 |
| AdTDC15 | AACGTGGGCGTTGATAATATCGGTAAGCTCGTCGTGTACGGCTCTGATCAGACTCATTCT | 600 |
| AdTDC16 | AACGTGGGCGTTGATAATATCGGTAAGCTCGTCGTGTACGGCTCTGATCAGACTCATTCT | 600 |
| AdTDC17 | AACGTGGGCGTTGATAATATCGGTAAGCTCGTCGTGTACGGCTCTGATCAGACTCATTCT | 600 |
| AdTDC18 | AACGTGGGCGTTGATAATATCGGTAAGCTCGTCGTGTACGGCTCTGATCAGACTCATTCT | 600 |
| AdTDC19 | AACGTGGGCGTTGATAATATCGGTAAGCTCGTCGTGTACGGCTCTGATCAGACTCATTCT | 600 |
| AdTDC20 | AACGTGGGCGTTGATAATATCGGTAAGCTCGTCGTGTACGGCTCTGATCAGACTCATTCT | 600 |
|         | *****                                                        |     |

|            |                                                               |     |
|------------|---------------------------------------------------------------|-----|
| Achn173261 | ACTTATACCAAGGCGTGTAAAGCTGGCGGGGATATATCCGCGCAACATACGATCGGTGCCC | 660 |
| AdTDC1     | ACTTACACCAAGGCGTGTAAAGCTGGCGGGGATATATCCGCGCAACATACGATCGGTGCCC | 660 |
| AdTDC2     | ACTTACACCAAGGCGTGTAAAGCTGGCGGGGATATATCCGCGCAACATACGATCGGTGCCC | 660 |
| AdTDC3     | ACTTACACCAAGGCGTGTAAAGCTGGCGGGGATATATCCGCGCAACATACGATCGGTGCCC | 660 |
| AdTDC4     | ACTTACACCAAGGCGTGTAAAGCTGGCGGGGATATATCCGCGCAACATACGATCGGTGCCC | 660 |
| AdTDC5     | ACTTACACCAAGGCGTGTAAAGCTGGCGGGGATATATCCGCGCAACATACGATCGGTGCCC | 660 |
| AdTDC6     | ACTTACACCAAGGCGTGTAAAGCTGGCGGGGATATATCCGCGCAACATACGATCGGTGCCC | 660 |
| AdTDC7     | ACTTACACCAAGGCGTGTAAAGCTGGCGGGGATATATCCGCGCAACATACGATCGGTGCCC | 660 |
| AdTDC8     | ACTTACACCAAGGCGTGTAAAGCTGGCGGGGATATATCCGCGCAACATACGATCGGTGCCC | 660 |
| AdTDC9     | ACTTACACCAAGGCGTGTAAAGCTGGCGGGGATATATCCGCGCAACATACGATCGGTGCCC | 660 |
| AdTDC10    | ACTTACACCAAGGCGTGTAAAGCTGGCGGGGATATATCCGCGCAACATACGATCGGTGCCC | 660 |
| AdTDC11    | ACTTATACCAAGGCGTGTAAAGCTGGCGGGGATATATCCGCGCAACATACGATCGGTGCCC | 660 |
| AdTDC12    | ACTTATACCAAGGCGTGTAAAGCTGGCGGGGATATATCCGCGCAACATACGATCGGTGCCC | 660 |
| AdTDC13    | ACTTATACCAAGGCGTGTAAAGCTGGCGGGGATATATCCGCGCAACATACGATCGGTGCCC | 660 |
| AdTDC14    | ACTTATACCAAGGCGTGTAAAGCTGGCGGGGATATATCCGCGCAACATACGATCGGTGCCC | 660 |
| AdTDC15    | ACTTATACCAAGGCGTGTAAAGCTGGCGGGGATATATCCGCGCAACATACGATCGGTGCCC | 660 |
| AdTDC16    | ACTTATACCAAGGCGTGTAAAGCTGGCGGGGATATATCCGCGCAACATACGATCGGTGCCC | 660 |
| AdTDC17    | ACTTATACCAAGGCGTGTAAAGCTGGCGGGGATATATCCGCGCAACATACGATCGGTGCCC | 660 |
| AdTDC18    | ACTTATACCAAGGCGTGTAAAGCTGGCGGGGATATATCCGCGCAACATACGATCGGTGCCC | 660 |
| AdTDC19    | ACTTATACCAAGGCGTGTAAAGCTGGCGGGGATATATCCGCGCAACATACGATCGGTGCCC | 660 |
| AdTDC20    | ACTTATACCAAGGCGTGTAAAGCTGGCGGGGATATATCCGCGCAACATACGATCGGTGCCC | 660 |
|            | *****                                                         |     |

|            |                                                              |     |
|------------|--------------------------------------------------------------|-----|
| Achn173261 | GCAGGGTCCGACACGTGTTTCGCTATGTCCCCTGTGGCGCTGAGGAAGGTGATAGATGCT | 720 |
| AdTDC1     | GCAGGGTCCAACACGTGTTTCGCTATGTCCCCTGTGGCGCTGAGGAAGGTGATAGATACT | 720 |
| AdTDC2     | GCAGGGTCCAACACGTGTTTCGCTATGTCCCCTGTGGCGCTGAGGAAGGTGATAGATACT | 720 |
| AdTDC3     | GCAGGGTCCAACACGTGTTTCGCTATGTCCCCTGTGGCGCTGAGGAAGGTGATAGATACT | 720 |
| AdTDC4     | GCAGGGTCCAACACGTGTTTCGCTATGTCCCCTGTGGCGCTGAGGAAGGTGATAGATACT | 720 |
| AdTDC5     | GCAGGGTCCAACACGTGTTTCGCTATGTCCCCTGTGGCGCTGAGGAAGGTGATAGATACT | 720 |
| AdTDC6     | GCAGGGTCCAACACGTGTTTCGCTATGTCCCCTGTGGCGCTGAGGAAGGTGATAGATACT | 720 |
| AdTDC7     | GCAGGGTCCAACACGTGTTTCGCTATGTCCCCTGTGGCGCTGAGGAAGGTGATAGATACT | 720 |
| AdTDC8     | GCAGGGTCCAACACGTGTTTCGCTATGTCCCCTGTGGCGCTGAGGAAGGTGATAGATACT | 720 |
| AdTDC9     | GCAGGGTCCGACACGTGTTTCGCTATGTCCCCTGTGGCGCTGAGGAAGGTGATAGATGCT | 720 |
| AdTDC10    | GCAGGGTCCGACACGTGTTTCGCTATGTCCCCTGTGGCGCTGAGGAAGGTGATAGATGCT | 720 |



|         |                                                              |     |
|---------|--------------------------------------------------------------|-----|
| AdTDC11 | GCAGGGTCCGACACGTGTTTCGCTATGTCCCCTGTGGCGCTGAGGAAGGTGATAGATGCT | 720 |
| AdTDC12 | GCAGGGTCCGACACGTGTTTCGCTATGTCCCCTGTGGCGCTGAGGAAGGTGATAGATGCT | 720 |
| AdTDC13 | GCAGGGTCCGACACGTGTTTCGCTATGTCCCCTGTGGCGCTGAGGAAGGTGATAGATGCT | 720 |
| AdTDC14 | GCAGGGTCCGACACGTGTTTCGCTATGTCCCCTGTGGCGCTGAGGAAGGTGATAGATGCT | 720 |
| AdTDC15 | GCAGGGTCCGACACGTGTTTCGCTATGTCCCCTGTGGCGCTGAGGAAGGTGATAGATGCT | 720 |
| AdTDC16 | GCAGGGTTCGACACGTGTTTCGCTATGTCCCCTGTGGCGCTGAGGAAGGTGATAGATGCT | 720 |
| AdTDC17 | GCAGGGTTCGACACGTGTTTCGCTATGTCCCCTGTGGCGCTGAGGAAGGTGATAGATGCT | 720 |
| AdTDC18 | GCAGGGTTCGACACGTGTTTCGCTATGTCCCCTGTGGCGCTGAGGAAGGTGATAGATGCT | 720 |
| AdTDC19 | GCAGGGTTCGACACGTGTTTCGCTATGTCCCCTGTGGCGCTGAGGAAGGTGATAGATGCT | 720 |
| AdTDC20 | GCAGGGTTCGACACGTGTTTCGCTATGTCCCCTGTGGCGCTGAGGAAGGTGATAGATGCT | 720 |

\*\*\*\*\* \* \*\*\*\*\*

|            |                                                              |     |
|------------|--------------------------------------------------------------|-----|
| Achn173261 | GACCTGGCAGCCGGGATGGTCCCACTTTATTTGTGTGTGACTGTGGGGACAACCTCAACC | 780 |
| AdTDC1     | GACGTGGCAGCCGGGCTGGTCCCACTTTATTTGTGTGTGACTGTGGGGACAACCTCAACC | 780 |
| AdTDC2     | GACGTGGCAGCCGGGCTGGTCCCACTTTATTTGTGTGTGACTGTGGGGACAACCTCAACC | 780 |
| AdTDC3     | GACGTGGCAGCCGGGCTGGTCCCACTTTATTTGTGTGTGACTGTGGGGACAACCTCAACC | 780 |
| AdTDC4     | GACGTGGCAGCCGGGCTGGTCCCACTTTATTTGTGTGTGACTGTGGGGACAACCTCAACC | 780 |
| AdTDC5     | GACGTGGCAGCCGGGCTGGTCCCACTTTATTTGTGTGTGACTGTGGGGACAACCTCAACC | 780 |
| AdTDC6     | GACGTGGCAGCCGGGCTGGTCCCACTTTATTTGTGTGTGACTGTGGGGACAACCTCAACC | 780 |
| AdTDC7     | GACGTGGCAGCCGGGCTGGTCCCACTTTATTTGTGTGTGACTGTGGGGACAACCTCAACC | 780 |
| AdTDC8     | GACGTGGCAGCCGGGCTGGTCCCACTTTATTTGTGTGTGACTGTGGGGACAACCTCAACC | 780 |
| AdTDC9     | GACGTGGCAGCCGGGCTGGTCCCACTTTATTTGTGTGTGACTGTGGGGACAACCTCAACG | 780 |
| AdTDC10    | GACGTGGCAGCCGGGCTGGTCCCACTTTATTTGTGTGTGACTGTGGGGACAACCTCAACG | 780 |
| AdTDC11    | GACCTGGCAGCCGGGTTGGTCCCACTTTATTTGTGTGTGACTGTGGGGACAACCTCAACC | 780 |
| AdTDC12    | GACCTGGCAGCCGGGTTGGTCCCACTTTATTTGTGTGTGACTGTGGGGACAACCTCAACC | 780 |
| AdTDC13    | GACCTGGCAGCCGGGTTGGTCCCACTTTATTTGTGTGTGACTGTGGGGACAACCTCAACC | 780 |
| AdTDC14    | GACCTGGCAGCCGGGTTGGTCCCACTTTATTTGTGTGTGACTGTGGGGACAACCTCAACC | 780 |
| AdTDC15    | GACCTGGCAGCCGGGTTGGTCCCACTTTATTTGTGTGTGACTGTGGGGACAACCTCAACC | 780 |
| AdTDC16    | GACCTGGCAGCCGGGCTGGTCCCACTTTATTTGTGTGTGACTGTGGGGACAACCTCAACC | 780 |
| AdTDC17    | GACCTGGCAGCCGGGCTGGTCCCACTTTATTTGTGTGTGACTGTGGGGACAACCTCAACC | 780 |
| AdTDC18    | GACCTGGCAGCCGGGCTGGTCCCACTTTATTTGTGTGTGACTGTGGGGACAACCTCAACC | 780 |
| AdTDC19    | GACCTGGCAGCCGGGCTGGTCCCACTTTATTTGTGTGTGACTGTGGGGACAACCTCAACC | 780 |
| AdTDC20    | GACCTGGCAGCCGGGTTGGTCCCACTTTATTTGTGTGTGACTGTGGGGACAACCTCAACC | 780 |

\*\*\* \*\*\*\*\*

|            |                                                              |     |
|------------|--------------------------------------------------------------|-----|
| Achn173261 | ACTGCGGTTGATCCGCTGGAGGACCTTGCTGATGTTGCGAACGATTACGGCGTTTGGGTC | 840 |
| AdTDC1     | ACTCCGGTTGATCCGCTGGAGGACCTTGCTGATGTTGCGAACGATTACGGCGTTTGGATC | 840 |
| AdTDC2     | ACTCCGGTTGATCCGCTGGAGGACCTTGCTGATGTTGCGAACGATTACGGCGTTTGGATC | 840 |
| AdTDC3     | ACTCCGGTTGATCCGCTGGAGGACCTTGCTGATGTTGCGAACGATTACGGCGTTTGGATC | 840 |
| AdTDC4     | ACTCCGGTTGATCCGCTGGAGGACCTTGCTGATGTTGCGAACGATTACGGCGTTTGGATC | 840 |
| AdTDC5     | ACTCCGGTTGATCCGCTGGAGGACCTTGCTGATGTTGCGAACGATTACGGCGTTTGGATC | 840 |
| AdTDC6     | ACTCCGGTTGATCCGCTGGAGGACCTTGCTGATGTTGCGAACGATTACGGCGTTTGGATC | 840 |
| AdTDC7     | ACTCCGGTTGATCCGCTGGAGGACCTTGCTGATGTTGCGAACGATTACGGCGTTTGGATC | 840 |
| AdTDC8     | ACTCCGGTTGATCCGCTGGAGGACCTTGCTGATGTTGCGAACGATTACGGCGTTTGGATC | 840 |

|         |                                                              |     |
|---------|--------------------------------------------------------------|-----|
| AdTDC9  | ACTGCGGTTGATCCGCTGGAGGACCTTGCTGATGTTGCTAACGATTACGGCGTTTGGGTC | 840 |
| AdTDC10 | ACTGCGGTTGATCCGCTGGAGGACCTTGCTGATGTTGCTAACGATTACGGCGTTTGGGTC | 840 |
| AdTDC11 | ACTGCGGTTGATCCGCTGGAGGACCTTGCTGATGTTGCGAACGATTATGGCGTTTGGGTC | 840 |
| AdTDC12 | ACTGCGGTTGATCCGCTGGAGGACCTTGCTGATGTTGCGAACGATTATGGCGTTTGGGTC | 840 |
| AdTDC13 | ACTGCGGTTGATCCGCTGGAGGACCTTGCTGATGTTGCGAACGATTATGGCGTTTGGGTC | 840 |
| AdTDC14 | ACTGCGGTTGATCCGCTGGAGGACCTTGCTGATGTTGCGAACGATTATGGCGTTTGGGTC | 840 |
| AdTDC15 | ACTGCGGTTGATCCGCTGGAGGACCTTGCTGATGTTGCGAACGATTATGGCGTTTGGGTC | 840 |
| AdTDC16 | ACTGCGGTTGATCCGCTGGAGGACCTTGCTGATGTTGCGACCGATTATGGCGTTTGGGTC | 840 |
| AdTDC17 | ACTGCGGTTGATCCGCTGGAGGACCTTGCTGATGTTGCGACCGATTATGGCGTTTGGGTC | 840 |
| AdTDC18 | ACTGCGGTTGATCCGCTGGAGGACCTTGCTGATGTTGCGACCGATTATGGCGTTTGGGTC | 840 |
| AdTDC19 | ACTGCGGTTGATCCGCTGGAGGACCTTGCTGATGTTGCGACCGATTATGGCGTTTGGGTC | 840 |
| AdTDC20 | ACTGCGGTTGATCCGCTGGAGGACCTTGCTGATGTTGCGAACGATTATGGCGTTTGGGTC | 840 |

\*\*\* \*\*\*\*\* \* \*\*\*\*\* \*\*\*\*\* \*\*

|            |                                                             |     |
|------------|-------------------------------------------------------------|-----|
| Achn173261 | CACGTGGACGCTGCCTACGGAGGGAGCGCGTGTATTTGCCAGAGTTCGGGCACTACCTG | 900 |
| AdTDC1     | CACGTGGACGCTGCCTACGGAGGGAGCGCGTGTATTTGCCAGAGTTCGGGCACTACCTG | 900 |
| AdTDC2     | CACGTGGACGCTGCCTACGGAGGGAGCGCGTGTATTTGCCAGAGTTCGGGCACTACCTG | 900 |
| AdTDC3     | CACGTGGACGCTGCCTACGGAGGGAGCGCGTGTATTTGCCAGAGTTCGGGCACTACCTG | 900 |
| AdTDC4     | CACGTGGACGCTGCCTACGGAGGGAGCGCGTGTATTTGCCAGAGTTCGGGCACTACCTG | 900 |
| AdTDC5     | CACGTGGACGCTGCCTACGGAGGGAGCGCGTGTATTTGCCAGAGTTCGGGCACTACCTG | 900 |
| AdTDC6     | CACGTGGACGCTGCCTACGGAGGGAGCGCGTGTATTTGCCAGAGTTCGGGCACTACCTG | 900 |
| AdTDC7     | CACGTGGACGCTGCCTACGGAGGGAGCGCGTGTATTTGCCAGAGTTCGGGCACTACCTG | 900 |
| AdTDC8     | CACGTGGACGCTGCCTACGGAGGGAGCGCGTGTATTTGCCAGAGTTCGGGCACTACCTG | 900 |
| AdTDC9     | CACGTGGACGCTGCCTACGGAGGGAGCGCGTGTATTTGCCAGAGTTCGGGCACTACCTG | 900 |
| AdTDC10    | CACGTGGACGCTGCCTACGGAGGGAGCGCGTGTATTTGCCAGAGTTCGGGCACTACCTG | 900 |
| AdTDC11    | CACGTGGACGCTGCCTACGGAGGGAGCGCGTGTATTTGCCAGAGTTCGGGCACTACCTG | 900 |
| AdTDC12    | CACGTGGACGCTGCCTACGGAGGGAGCGCGTGTATTTGCCAGAGTTCGGGCACTACCTG | 900 |
| AdTDC13    | CACGTGGACGCTGCCTACGGAGGGAGCGCGTGTATTTGCCAGAGTTCGGGCACTACCTG | 900 |
| AdTDC14    | CACGTGGACGCTGCCTACGGAGGGAGCGCGTGTATTTGCCAGAGTTCGGGCACTACCTG | 900 |
| AdTDC15    | CACGTGGACGCTGCCTACGGAGGGAGCGCGTGTATTTGCCAGAGTTCGGGCACTACCTG | 900 |
| AdTDC16    | CACGTGGACGCTGCCTACGGAGGGAGCGCGTGTATTTGCCAGAGTTCGGGCACTACCTG | 900 |
| AdTDC17    | CACGTGGACGCTGCCTACGGAGGGAGCGCGTGTATTTGCCAGAGTTCGGGCACTACCTG | 900 |
| AdTDC18    | CACGTGGACGCTGCCTACGGAGGGAGCGCGTGTATTTGCCAGAGTTCGGGCACTACCTG | 900 |
| AdTDC19    | CACGTGGACGCTGCCTACGGAGGGAGCGCGTGTATTTGCCAGAGTTCGGGCACTACCTG | 900 |
| AdTDC20    | CACGTGGACGCTGCCTACGGAGGGAGCGCGTGTATTTGCCAGAGTTCGGGCACTACCTG | 900 |

\*\*\*\*\*

|            |                                                                |     |
|------------|----------------------------------------------------------------|-----|
| Achn173261 | GACGGGATCGAGCTAGTTCGACTCACTGAGTCTGAGCCCGCACAAAGTGGCTGCTCAGTTAC | 960 |
| AdTDC1     | GACGGGATCGAGCTAGTTCGACTCACTGAGTCTGAGCCCGCACAAAGTGGCTGCTCAGTTAC | 960 |
| AdTDC2     | GACGGGATCGAGCTAGTTCGACTCACTGAGTCTGAGCCCGCACAAAGTGGCTGCTCAGTTAC | 960 |
| AdTDC3     | GACGGGATCGAGCTAGTTCGACTCACTGAGTCTGAGCCCGCACAAAGTGGCTGCTCAGTTAC | 960 |
| AdTDC4     | GACGGGATCGAGCTAGTTCGACTCACTGAGTCTGAGCCCGCACAAAGTGGCTGCTCAGTTAC | 960 |
| AdTDC5     | GACGGGATCGAGCTAGTTCGACTCACTGAGTCTGAGCCCGCACAAAGTGGCTGCTCAGTTAC | 960 |
| AdTDC6     | GACGGGATCGAGCTAGTTCGACTCACTGAGTCTGAGCCCGCACAAAGTGGCTGCTCAGTTAC | 960 |

|         |                                                               |     |
|---------|---------------------------------------------------------------|-----|
| AdTDC7  | GACGGGATCGAGCTAGTTGACTCACTGAGTCTGAGCCCGCACAAAGTGGCTGCTCAGTTAC | 960 |
| AdTDC8  | GACGGGATCGAGCTAGTTGACTCACTGAGTCTGAGCCCGCACAAAGTGGCTGCTCAGTTAC | 960 |
| AdTDC9  | GACGGGATCGAGCAAGTCGACTCACTGAGTCTGAGCCCGCACAAAGTGGCTGCTCAGTTAC | 960 |
| AdTDC10 | GACGGGATCGAGCAAGTCGACTCACTGAGTCTGAGCCCGCACAAAGTGGCTGCTCAGTTAC | 960 |
| AdTDC11 | GACGGGATCGAGCTAGTCGACTCACTGAGTCTGAGCCCGCACAAAGTGGCTGCTCAGTTAC | 960 |
| AdTDC12 | GACGGGATCGAGCTAGTCGACTCACTGAGTCTGAGCCCGCACAAAGTGGCTGCTCAGTTAC | 960 |
| AdTDC13 | GACGGGATCGAGCTAGTCGACTCACTGAGTCTGAGCCCGCACAAAGTGGCTGCTCAGTTAC | 960 |
| AdTDC14 | GACGGGATCGAGCTAGTCGACTCACTGAGTCTGAGCCCGCACAAAGTGGCTGCTCAGTTAC | 960 |
| AdTDC15 | GACGGGATCGAGCTAGTCGACTCACTGAGTCTGAGCCCGCACAAAGTGGCTGCTCAGTTAC | 960 |
| AdTDC16 | GACGGGATCGAGCTAGTCGACTCACTGAGTCTGAGCCCGCACAAAGTGGCTGCTCAGTTAC | 960 |
| AdTDC17 | GACGGGATCGAGCTAGTCGACTCACTGAGTCTGAGCCCGCACAAAGTGGCTGCTCAGTTAC | 960 |
| AdTDC18 | GACGGGATCGAGCTAGTCGACTCACTGAGTCTGAGCCCGCACAAAGTGGCTGCTCAGTTAC | 960 |
| AdTDC19 | GACGGGATCGAGCTAGTCGACTCACTGAGTCTGAGCCCGCACAAAGTGGCTGCTCAGTTAC | 960 |
| AdTDC20 | GACGGGATCGAGCTAGTCGACTCACTGAGTCTGAGCCCGCACAAAGTGGCTGCTCAGTTAC | 960 |

\*\*\*\*\* \*\*\* \*\*\*\*\*

|            |                                                              |      |
|------------|--------------------------------------------------------------|------|
| Achn173261 | TTGGACTGCTGTTGCTTGTGGGTGAAGCAACCCGGATTGCTAGTCAAAGCCTTGAGCACT | 1020 |
| AdTDC1     | TTGGACTGCTGTTGCTTGTGGGTGAAGAAACCCGGATTGCTAGTCAAAGCCTTGAGCACT | 1020 |
| AdTDC2     | TTGGACTGCTGTTGCTTGTGGGTGAAGAAACCCGGATTGCTAGTCAAAGCCTTGAGCACT | 1020 |
| AdTDC3     | TTGGACTGCTGTTGCTTGTGGGTGAAGAAACCCGGATTGCTAGTCAAAGCCTTGAGCACT | 1020 |
| AdTDC4     | TTGGACTGCTGTTGCTTGTGGGTGAAGAAACCCGGATTGCTAGTCAAAGCCTTGAGCACT | 1020 |
| AdTDC5     | TTGGACTGCTGTTGCTTGTGGGTGAAGAAACCCGGATTGCTAGTCAAAGCCTTGAGCACT | 1020 |
| AdTDC6     | TTGGACTGCTGTTGCTTGTGGGTGAAGAAACCCGGATTGCTAGTCAAAGCCTTGAGCACT | 1020 |
| AdTDC7     | TTGGACTGCTGTTGCTTGTGGGTGAAGAAACCCGGATTGCTAGTCAAAGCCTTGAGCACT | 1020 |
| AdTDC8     | TTGGACTGCTGTTGCTTGTGGGTGAAGAAACCCGGATTGCTAGTCAAAGCCTTGAGCACT | 1020 |
| AdTDC9     | TTGGACTGCTGTTGCTTGTGGGTGAAGAAACCCGGATTGCTAGTCAAAGCCTTGAGCACT | 1020 |
| AdTDC10    | TTGGACTGCTGTTGCTTGTGGGTGAAGAAACCCGGATTGCTAGTCAAAGCCTTGAGCACT | 1020 |
| AdTDC11    | TTGGACTGCTGTTGCTTGTGGGTGAAGCAACCCGGATTGCTAGTCAAAGCCTTGAGCACT | 1020 |
| AdTDC12    | TTGGACTGCTGTTGCTTGTGGGTGAAGCAACCCGGATTGCTAGTCAAAGCCTTGAGCACT | 1020 |
| AdTDC13    | TTGGACTGCTGTTGCTTGTGGGTGAAGCAACCCGGATTGCTAGTCAAAGCCTTGAGCACT | 1020 |
| AdTDC14    | TTGGACTGCTGTTGCTTGTGGGTGAAGCAACCCGGATTGCTAGTCAAAGCCTTGAGCACT | 1020 |
| AdTDC15    | TTGGACTGCTGTTGCTTGTGGGTGAAGCAACCCGGATTGCTAGTCAAAGCCTTGAGCACT | 1020 |
| AdTDC16    | TTGGACTGCTGTTGCTTGTGGGTGAAGCAACCCGGATTGCTAGTCAAAGCCTTGAGCACT | 1020 |
| AdTDC17    | TTGGACTGCTGTTGCTTGTGGGTGAAGCAACCCGGATTGCTAGTCAAAGCCTTGAGCACT | 1020 |
| AdTDC18    | TTGGACTGCTGTTGCTTGTGGGTGAAGCAACCCGGATTGCTAGTCAAAGCCTTGAGCACT | 1020 |
| AdTDC19    | TTGGACTGCTGTTGCTTGTGGGTGAAGCAACCCGGATTGCTAGTCAAAGCCTTGAGCACT | 1020 |
| AdTDC20    | TTGGACTGCTGTTGCTTGTGGGTGAAGCAACCCGGATTGCTAGTCAAAGCCTTGAGCACT | 1020 |

\*\*\*\*\* \*\*\*\*\*

|            |                                                              |      |
|------------|--------------------------------------------------------------|------|
| Achn173261 | AACCCGGAGTACTTGAGAAACAAACCCAGAGAGTCGGACTCGGTGGTGGACTACAAGGAC | 1080 |
| AdTDC1     | AACCCGGAGTACTTGAGAAACAAACCCAGTGAGTCGGACTCGGTGGTGGACTACAAGGAC | 1080 |
| AdTDC2     | AACCCGGAGTACTTGAGAAACAAACCCAGTGAGTCGGACTCGGTGGTGGACTACAAGGAC | 1080 |
| AdTDC3     | AACCCGGAGTACTTGAGAAACAAACCCAGTGAGTCGGACTCGGTGGTGGACTACAAGGAC | 1080 |
| AdTDC4     | AACCCGGAGTACTTGAGAAACAAACCCAGTGAGTCGGACTCGGTGGTGGACTACAAGGAC | 1080 |

|            |                                                               |      |
|------------|---------------------------------------------------------------|------|
| AdTDC5     | AACCCGGAGTACTTGAGAAACAAACCCAGTGAGTCGGACTCGGTGGTGGACTACAAGGAC  | 1080 |
| AdTDC6     | AACCCGGAGTACTTGAGAAACAAACCCAGTGAGTCGGACTCGGTGGTGGACTACAAGGAC  | 1080 |
| AdTDC7     | AACCCGGAGTACTTGAGAAACAAACCCAGTGAGTCGGACTCGGTGGTGGACTACAAGGAC  | 1080 |
| AdTDC8     | AACCCGGAGTACTTGAGAAACAAACCCAGTGAGTCGGACTCGGTGGTGGACTACAAGGAC  | 1080 |
| AdTDC9     | AACCCGGAGTACTTGAGAAACAAACCCAGTGAGTCGGACTCGGTGGTGGACTACAAGGAC  | 1080 |
| AdTDC10    | AACCCGGAGTACTTGAGAAACAAACCCAGTGAGTCGGACTCGGTGGTGGACTACAAGGAC  | 1080 |
| AdTDC11    | AACCCGGAGTACTTGAGAAACAAACCCAGTGAGTCGGACTCGGTGGTGGACTACAAGGAC  | 1080 |
| AdTDC12    | AACCCGGAGTACTTGAGAAACAAACCCAGTGAGTCGGACTCGGTGGTGGACTACAAGGAC  | 1080 |
| AdTDC13    | AACCCGGAGTACTTGAGAAACAAACCCAGTGAGTCGGACTCGGTGGTGGACTACAAGGAC  | 1080 |
| AdTDC14    | AACCCGGAGTACTTGAGAAACAAACCCAGTGAGTCGGACTCGGTGGTGGACTACAAGGAC  | 1080 |
| AdTDC15    | AACCCGGAGTACTTGAGAAACAAACCCAGTGAGTCGGACTCGGTGGTGGACTACAAGGAC  | 1080 |
| AdTDC16    | AACCCGGAGTACTTGAGAAACAAACCCAGTGAGTCGGATTTCGGTGGTGGACTACAAGGAC | 1080 |
| AdTDC17    | AACCCGGAGTACTTGAGAAACAAACCCAGTGAGTCGGATTTCGGTGGTGGACTACAAGGAC | 1080 |
| AdTDC18    | AACCCGGAGTACTTGAGAAACAAACCCAGTGAGTCGGATTTCGGTGGTGGACTACAAGGAC | 1080 |
| AdTDC19    | AACCCGGAGTACTTGAGAAACAAACCCAGTGAGTCGGATTTCGGTGGTGGACTACAAGGAC | 1080 |
| AdTDC20    | AACCCGGAGTACTTGAGAAACAAACCCAGTGAGTCGGACTCGGTGGTGGACTACAAGGAC  | 1080 |
| *****      |                                                               |      |
| Achn173261 | TGGCAAGTGGGTACGGGTCGTCGGTTCAAAGCGCTCCGACTCTGGCTCGTTTTACGTAGT  | 1140 |
| AdTDC1     | TGGCAAGTGGGTACGGGTCGTCGGTTCAAAGCGCTCCGACTCTGGCTCGTTTTACGTAGC  | 1140 |
| AdTDC2     | TGGCAAGTGGGTACGGGTCGTCGGTTCAAAGCGCTCCGACTCTGGCTCGTTTTACGTAGC  | 1140 |
| AdTDC3     | TGGCAAGTGGGTACGGGTCGTCGGTTCAAAGCGCTCCGACTCTGGCTCGTTTTACGTAGC  | 1140 |
| AdTDC4     | TGGCAAGTGGGTACGGGTCGTCGGTTCAAAGCGCTCCGACTCTGGCTCGTTTTACGTAGC  | 1140 |
| AdTDC5     | TGGCAAGTGGGTACGGGTCGTCGGTTCAAAGCGCTCCGACTCTGGCTCGTTTTACGTAGC  | 1140 |
| AdTDC6     | TGGCAAGTGGGTACGGGTCGTCGGTTCAAAGCGCTCCGACTCTGGCTCGTTTTACGTAGC  | 1140 |
| AdTDC7     | TGGCAAGTGGGTACGGGTCGTCGGTTCAAAGCGCTCCGACTCTGGCTCGTTTTACGTAGC  | 1140 |
| AdTDC8     | TGGCAAGTGGGTACGGGTCGTCGGTTCAAAGCGCTCCGACTCTGGCTCGTTTTACGTAGC  | 1140 |
| AdTDC9     | TGGCAAGTGGGTACGGGTCGTCGGTTCAAAGCGCTCCGACTCTGGCTCGTTTTACGTAGC  | 1140 |
| AdTDC10    | TGGCAAGTGGGTACGGGTCGTCGGTTCAAAGCGCTCCGACTCTGGCTCGTTTTACGTAGC  | 1140 |
| AdTDC11    | TGGCAAGTGGGTACGGGTCGTCGGTTCAAAGCGCTCCGACTCTGGCTCGTTTTACGTAGT  | 1140 |
| AdTDC12    | TGGCAAGTGGGTACGGGTCGTCGGTTCAAAGCGCTCCGACTCTGGCTCGTTTTACGTAGT  | 1140 |
| AdTDC13    | TGGCAAGTGGGTACGGGTCGTCGGTTCAAAGCGCTCCGACTCTGGCTCGTTTTACGTAGT  | 1140 |
| AdTDC14    | TGGCAAGTGGGTACGGGTCGTCGGTTCAAAGCGCTCCGACTCTGGCTCGTTTTACGTAGT  | 1140 |
| AdTDC15    | TGGCAAGTGGGTACGGGTCGTCGGTTCAAAGCGCTCCGACTCTGGCTCGTTTTACGTAGT  | 1140 |
| AdTDC16    | TGGCAAGTGGGTACGGGTCGTCGGTTCAAAGCGCTCCGACTCTGGCTCGTTTTACGTAGC  | 1140 |
| AdTDC17    | TGGCAAGTGGGTACGGGTCGTCGGTTCAAAGCGCTCCGACTCTGGCTCGTTTTACGTAGC  | 1140 |
| AdTDC18    | TGGCAAGTGGGTACGGGTCGTCGGTTCAAAGCGCTCCGACTCTGGCTCGTTTTACGTAGC  | 1140 |
| AdTDC19    | TGGCAAGTGGGTACGGGTCGTCGGTTCAAAGCGCTCCGACTCTGGCTCGTTTTACGTAGC  | 1140 |
| AdTDC20    | TGGCAAGTGGGTACGGGTCGTCGGTTCAAAGCGCTCCGACTCTGGCTCGTTTTACGTAGT  | 1140 |
| *****      |                                                               |      |
| Achn173261 | TATGGGATCGCCAACCTCCAGAGCCACATCCGGTCCGATGTCAGGATGGCCAAGATGTTC  | 1200 |
| AdTDC1     | TATGGGATCGCCAACCTCCAGAGCCACATCCGGTCCGACGTCAGGATGGCCAAGATGTTC  | 1200 |
| AdTDC2     | TATGGGATCGCCAACCTCCAGAGCCACATCCGGTCCGACGTCAGGATGGCCAAGATGTTC  | 1200 |

|         |                                                              |      |
|---------|--------------------------------------------------------------|------|
| AdTDC3  | TATGGGATCGCCAACCTCCAGAGCCACATCCGGTCCGACGTCAGGATGGCCAAGATGTTT | 1200 |
| AdTDC4  | TATGGGATCGCCAACCTCCAGAGCCACATCCGGTCCGACGTCAGGATGGCCAAGATGTTT | 1200 |
| AdTDC5  | TATGGGATCGCCAACCTCCAGAGCCACATCCGGTCCGACGTCAGGATGGCCAAGATGTTT | 1200 |
| AdTDC6  | TATGGGATCGCCAACCTCCAGAGCCACATCCGGTCCGACGTCAGGATGGCCAAGATGTTT | 1200 |
| AdTDC7  | TATGGGATCGCCAACCTCCAGAGCCACATCCGGTCCGACGTCAGGATGGCCAAGATGTTT | 1200 |
| AdTDC8  | TATGGGATCGCCAACCTCCAGAGCCACATCCGGTCCGACGTCAGGATGGCCAAGATGTTT | 1200 |
| AdTDC9  | TATGGGATCGCCAACCTCCAGAGCCACATCCGGTCCGACGTCAGGATGGCCAAGATGTTT | 1200 |
| AdTDC10 | TATGGGATCGCCAACCTCCAGAGCCACATCCGGTCCGACGTCAGGATGGCCAAGATGTTT | 1200 |
| AdTDC11 | TATGGGATCGCCAACCTCCAGAGCCACATCCGGTCCGATGTCAGGATGGCCAAGATGTTT | 1200 |
| AdTDC12 | TATGGGATCGCCAACCTCCAGAGCCACATCCGGTCCGATGTCAGGATGGCCAAGATGTTT | 1200 |
| AdTDC13 | TATGGTATCGCCAACCTCCAGAGCCACATCCGGTCCGATGTCAGGATGGCCAAGATGTTT | 1200 |
| AdTDC14 | TATGGGATCGCCAACCTCCAGAGCCACATCCGGTCCGATGTCAGGATGGCCAAGATGTTT | 1200 |
| AdTDC15 | TATGGGATCGCCAACCTCCAGAGCCACATCCGGTCCGATGTCAGGATGGCCAAGATGTTT | 1200 |
| AdTDC16 | TATGGGATCGCCAACCTCCAGAGCCACATCCGGTCCGACGTCAGGATGGCCAAGATGTTT | 1200 |
| AdTDC17 | TATGGGATCGCCAACCTCCAGAGCCACATCCGGTCCGACGTCAGGATGGCCAAGATGTTT | 1200 |
| AdTDC18 | TATGGGATCGCCAACCTCCAGAGCCACATCCGGTCCGACGTCAGGATGGCCAAGATGTTT | 1200 |
| AdTDC19 | TATGGGATCGCCAACCTCCAGAGCCACATCCGGTCCGACGTCAGGATGGCCAAGATGTTT | 1200 |
| AdTDC20 | TATGGTATCGCCAACCTCCAGAGCCACATCCGGTCCGATGTCAGGATGGCCAAGATGTTT | 1200 |

\*\*\*\*\*

|            |                                                                |      |
|------------|----------------------------------------------------------------|------|
| Achn173261 | GAGGGATTTCGTGAAGTCCGACCCGCGATTTCGAGTTGGTTGTGCCCCGGATCTTCTCACTG | 1260 |
| AdTDC1     | GAGGGGTTTCGTGAAGTCCGACCCGCGATTTCGAGTTGGTCGTGCCCCGGATCTTCTCATTG | 1260 |
| AdTDC2     | GAGGGGTTTCGTGAAGTCCGACCCGCGATTTCGAGTTGGTCGTGCCCCGGATCTTCTCATTG | 1260 |
| AdTDC3     | GAGGGGTTTCGTGAAGTCCGACCCGCGATTTCGAGTTGGTCGTGCCCCGGATCTTCTCATTG | 1260 |
| AdTDC4     | GAGGGGTTTCGTGAAGTCCGACCCGCGATTTCGAGTTGGTCGTGCCCCGGATCTTCTCATTG | 1260 |
| AdTDC5     | GAGGGGTTTCGTGAAGTCCGACCCGCGATTTCGAGTTGGTCGTGCCCCGGATCTTCTCATTG | 1260 |
| AdTDC6     | GAGGGGTTTCGTGAAGTCCGACCCGCGATTTCGAGTTGGTCGTGCCCCGGATCTTCTCATTG | 1260 |
| AdTDC7     | GAGGGGTTTCGTGAAGTCCGACCCGCGATTTCGAGTTGGTCGTGCCCCGGATCTTCTCATTG | 1260 |
| AdTDC8     | GAGGGGTTTCGTGAAGTCCGACCCGCGATTTCGAGTTGGTCGTGCCCCGGATCTTCTCATTG | 1260 |
| AdTDC9     | GAGGGGTTTCGTGAAGTCCGACCTGCGATTTCGAGTTGGTCGTGCCCCGGATCTTCTCACTG | 1260 |
| AdTDC10    | GAGGGGTTTCGTGAAGTCCGACCTGCGATTTCGAGTTGGTCGTGCCCCGGATCTTCTCACTG | 1260 |
| AdTDC11    | GAGGGGTTTCGTGAAGTCCGACCCGCGATTTCGAGTTGGTTGTGCCCCGAATCTTCTCACTG | 1260 |
| AdTDC12    | GAGGGGTTTCGTGAAGTCCGACCCGCGATTTCGAGTTGGTTGTGCCCCGAATCTTCTCACTG | 1260 |
| AdTDC13    | GAGGGGTTTCGTGAAGTCCGACCCGCGATTTCGAGTTGGTTGTGCCCCGAATCTTCTCACTG | 1260 |
| AdTDC14    | GAGGGGTTTCGTGAAGTCCGACCCGCGATTTCGAGTTGGTTGTGCCCCGAATCTTCTCACTG | 1260 |
| AdTDC15    | GAGGGGTTTCGTGAAGTCCGACCCGCGATTTCGAGTTGGTTGTGCCCCGAATCTTCTCACTG | 1260 |
| AdTDC16    | GAGGGGTTTCGTGAAGTCCGACCTGCGATTTCGAGTTGGTCGTGCCCCGGATCTTCTCATTG | 1260 |
| AdTDC17    | GAGGGGTTTCGTGAAGTCCGACCTGCGATTTCGAGTTGGTCGTGCCCCGGATCTTCTCATTG | 1260 |
| AdTDC18    | GAGGGGTTTCGTGAAGTCCGACCTGCGATTTCGAGTTGGTCGTGCCCCGGATCTTCTCATTG | 1260 |
| AdTDC19    | GAGGGGTTTCGTGAAGTCCGACCTGCGATTTCGAGTTGGTCGTGCCCCGGATCTTCTCATTG | 1260 |
| AdTDC20    | GAGGGGTTTCGTGAAGTCCGACCCGCGATTTCGAGTTGGTTGTGCCCCGAATCTTCTCACTG | 1260 |

\*\*\*\*\*

|            |                                                             |      |
|------------|-------------------------------------------------------------|------|
| Achn173261 | GTTTGCTTTCGTTTAAACCCGCACCCGGGATCATACCCGGGTACCTGGAGCTTTTAAAC | 1320 |
|------------|-------------------------------------------------------------|------|

|         |                                                               |      |
|---------|---------------------------------------------------------------|------|
| AdTDC1  | GTTTGCTTCCGGTTAAACCCGCACCCGGGATCATACCCGGATTACCTGGAGCTTCTAAAC  | 1320 |
| AdTDC2  | GTTTGCTTCCGGTTAAACCCGCACCCGGGATCATACCCGGATTACCTGGAGCTTCTAAAC  | 1320 |
| AdTDC3  | GTTTGCTTCCGGTTAAACCCGCACCCGGGATCATACCCGGATTACCTGGAGCTTCTAAAC  | 1320 |
| AdTDC4  | GTTTGCTTCCGGTTAAACCCGCACCCGGGATCATACCCGGATTACCTGGAGCTTCTAAAC  | 1320 |
| AdTDC5  | GTTTGCTTCCGGTTAAACCCGCACCCGGGATCATACCCGGATTACCTGGAGCTTCTAAAC  | 1320 |
| AdTDC6  | GTTTGCTTCCGGTTAAACCCGCACCCGGGATCATACCCGGATTACCTGGAGCTTCTAAAC  | 1320 |
| AdTDC7  | GTTTGCTTCCGGTTAAACCCGCACCCGGGATCATACCCGGATTACCTGGAGCTTCTAAAC  | 1320 |
| AdTDC8  | GTTTGCTTCCGGTTAAACCCGCACCCGGGATCATACCCGGATTACCTGGAGCTTCTAAAC  | 1320 |
| AdTDC9  | GTTTGCTTCCGGTTAAACCCGCACCCGGGATCATACCCGGTTACCTGGAGCTTTTAAAC   | 1320 |
| AdTDC10 | GTTTGCTTCCGGTTAAACCCGCACCCGGGATCATACCCGGTTACCTGGAGCTTTTAAAC   | 1320 |
| AdTDC11 | GTTTGCTTTTCGTTTAAACCCGCACCCGGGATCATACCCGGTTACCTGGAGCTTTTAAAC  | 1320 |
| AdTDC12 | GTTTGCTTTTCGTTTAAACCCGCACCCGGGATCATACCCGGTTACCTGGAGCTTTTAAAC  | 1320 |
| AdTDC13 | GTTTGCTTTTCGTTTAAACCCGCACCCGGGATCATACCCGGTTACCTGGAGCTTTTAAAC  | 1320 |
| AdTDC14 | GTTTGCTTTTCGTTTAAACCCGCACCCGGGATCATACCCGGTTACCTGGAGCTTTTAAAC  | 1320 |
| AdTDC15 | GTTTGCTTTTCGTTTAAACCCGCACCCGGGATCATACCCGGTTACCTGGAGCTTTTAAAC  | 1320 |
| AdTDC16 | GTTTGCTTCCGGTTAAACCCGCACCCGGGATCATACCCGGATTATCTGGAGCTTCTAAAC  | 1320 |
| AdTDC17 | GTTTGCTTCCGGTTAAACCCGCACCCGGGATCATACCCGGATTATCTGGAGCTTCTAAAC  | 1320 |
| AdTDC18 | GTTTGCTTCCGGTTAAACCCGCACCCGGGATCATACCCGGATTATCTGGAGCTTCTAAAC  | 1320 |
| AdTDC19 | GTTTGCTTCCGGTTAAACCCGCACCCGGGATCATACCCGGATTATCTGGAGCTTCTAAAC  | 1320 |
| AdTDC20 | GTTTGCTTTTCGTTTAAACCCGCACCCGGGATCATACCCGGATTATCTGGAGCTTCTAAAC | 1320 |



|            |                                                              |      |
|------------|--------------------------------------------------------------|------|
| AdTDC20    | GTCGCCGCTTGGAAGTTAATTAAGGAGGGAGCTGATGTTTTGCTCAGGTCAAAGGATGCT | 1500 |
| *****      |                                                              |      |
| Achn173261 | ACATAG                                                       | 1506 |
| AdTDC1     | ACATAG                                                       | 1506 |
| AdTDC2     | ACATAG                                                       | 1506 |
| AdTDC3     | ACATAG                                                       | 1506 |
| AdTDC4     | ACATAG                                                       | 1506 |
| AdTDC5     | ACATAG                                                       | 1506 |
| AdTDC6     | ACATAG                                                       | 1506 |
| AdTDC7     | ACATAG                                                       | 1506 |
| AdTDC8     | ACATAG                                                       | 1506 |
| AdTDC9     | ACATAG                                                       | 1506 |
| AdTDC10    | ACATAG                                                       | 1506 |
| AdTDC11    | ACATAG                                                       | 1506 |
| AdTDC12    | ACATAG                                                       | 1506 |
| AdTDC13    | ACATAG                                                       | 1506 |
| AdTDC14    | ACATAG                                                       | 1506 |
| AdTDC15    | ACATAG                                                       | 1506 |
| AdTDC16    | ACATAG                                                       | 1506 |
| AdTDC17    | ACATAG                                                       | 1506 |
| AdTDC18    | ACATAG                                                       | 1506 |
| AdTDC19    | ACATAG                                                       | 1506 |
| AdTDC20    | ACATAG                                                       | 1506 |

**Figure S3:** Clustal Omega alignment of the candidate *Actinidia deliciosa* TDCs. The number after AdTDC represents the cultivated *Escherichia coli* colony. Achn173261 is the TDC sequence of *Actinidia chinensis*.

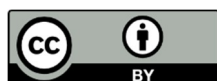

© 2019 by the authors. Submitted for possible open access publication under the terms and conditions of the Creative Commons Attribution (CC BY) license (<http://creativecommons.org/licenses/by/4.0/>).
